# Supplementary material for: A green route to synthesize poly(lactic acid)-based macromonomers in scCO2 for biodegradable nanoparticle production
Source: Royal Society of Chemistry journal article supplement (doi:10.1039/c4ra00333k), 2014-01-01
Supplement: c4ra00333k1.pdf [file c4ra00333k1.pdf]

*Supporting Information for:*

# Production of Poly (Lactic Acid) Macromonomers in scCO<sub>2</sub> with Well-Defined Molecular Structure

*Raffaele Ferrari<sup>1</sup>, Claudio Maria Pecoraro<sup>2</sup>, Giuseppe Storti<sup>3</sup> and Davide Moscatelli<sup>1,\*</sup>*

<sup>1</sup>Department of Chemistry, Materials and Chemical Engineering “Giulio Natta”, Politecnico di Milano, Via Luigi Mancinelli 7, 20131, Milano, Italy. <sup>2</sup>Dipartimento di Ingegneria Chimica, Gestionale, Informatica e Meccanica, University of Palermo, Viale delle Scienze Ed. 6, 90128, Palermo, Italy. <sup>3</sup>Institute for Chemical and Bioengineering, Department of Chemistry and Applied Biosciences, ETH Zurich, Vladimir-Prelog-Weg 1, 8093, Zurich, Switzerland

Corresponding author: [davide.moscatelli@polimi.it](mailto:davide.moscatelli@polimi.it)

## Macromonomer characterization

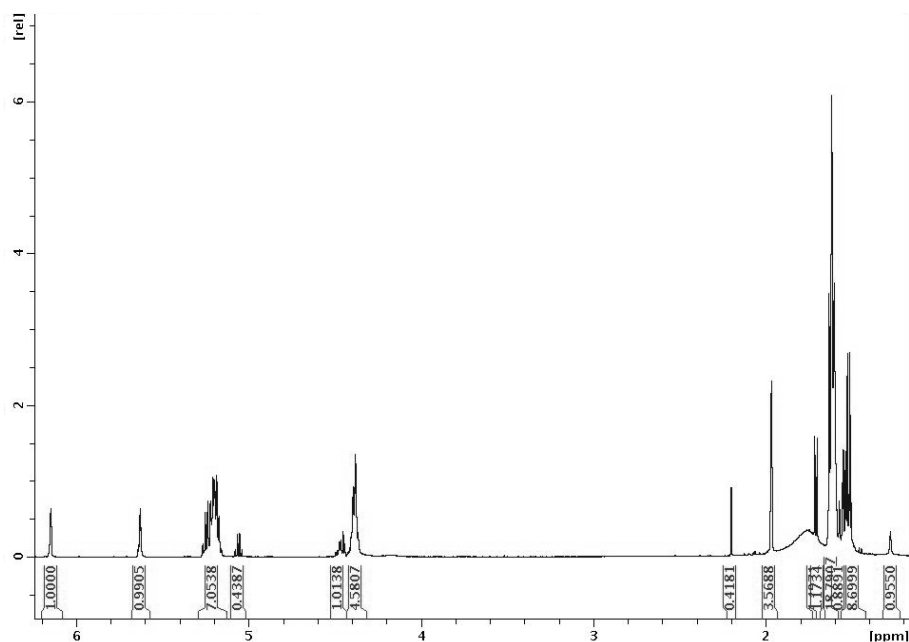

Figure S1. <sup>1</sup>H-NMR spectrum of Figure 2a with the peak integrals.

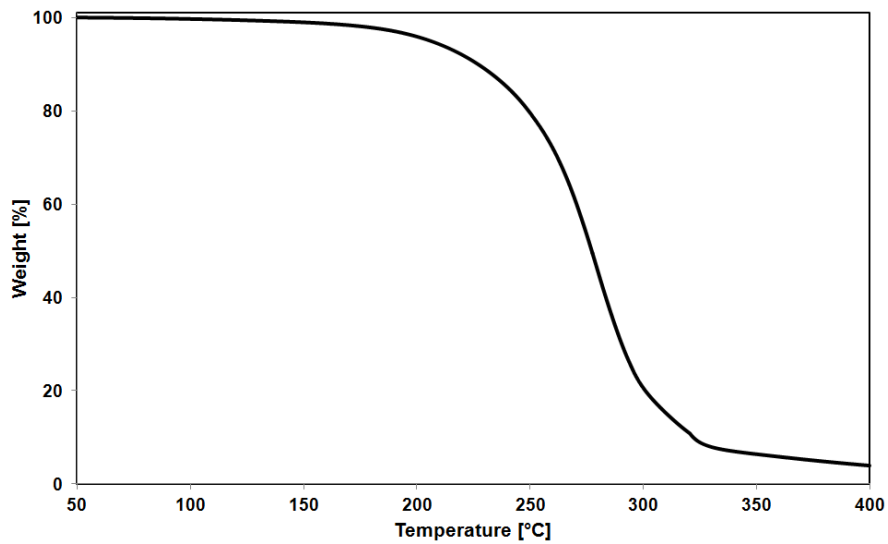

Figure S2. TGA thermogram of HEMA-LA<sub>6</sub> produced in scCO<sub>2</sub> at 90 °C for 4 days.

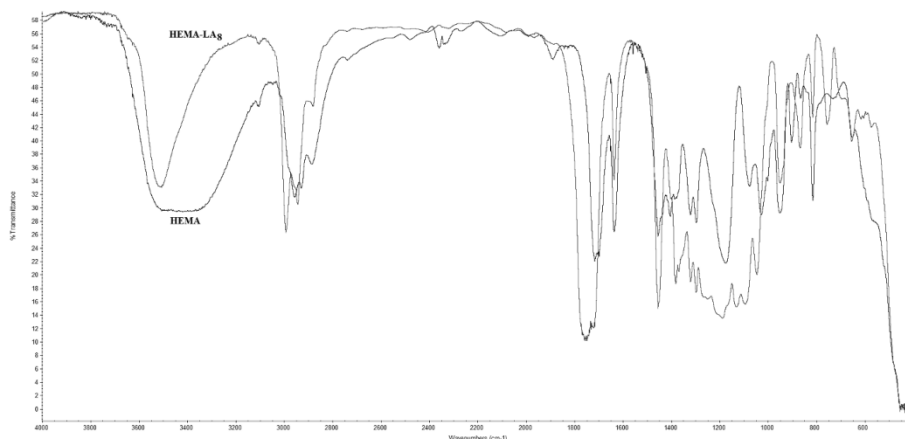

**Figure S3.** FT-IR spectra of HEMA and HEMA-LA<sub>8</sub> produced in scCO<sub>2</sub> at 90°C, 4 days.

FT-IR analysis has been carried out in order to provide a further evidence of the macromonomer formation. A comparison between the spectra of HEMA and HEMA-LA<sub>8</sub> is shown in **Figure S3**. The increase of the signal in the region of 1700 cm<sup>-1</sup> is clearly visible, indicating a significant increase of the amount of ester bonds compared to HEMA, thus proving the addition of lactic acid units. Moreover, the region of the vinyl bond stretching does not show differences between the two compounds, proving the effective retaining of HEMA double bond after ROP reaction.

## MALDI-TOF analyses

The main signals revealed from MALDI-TOF, and their comparison with the theoretical one are reported in **Table 2**, while the details of the spectra reported in **Figure 5** are listed here in **Figure S(4-5)**.

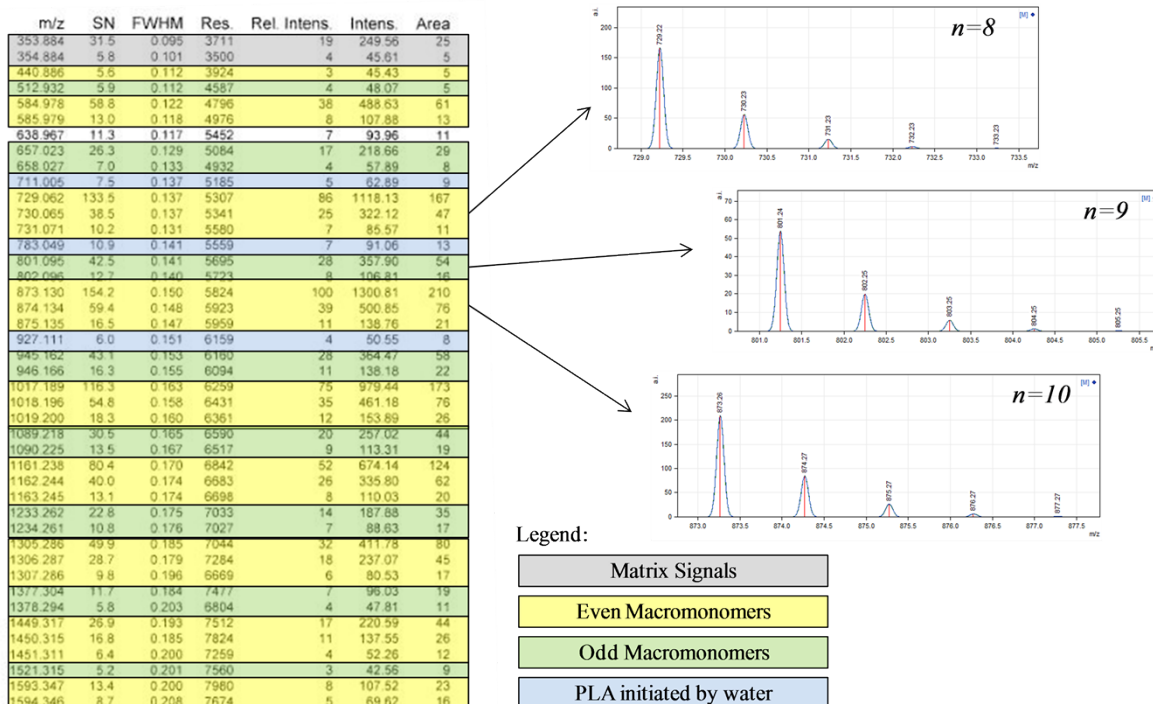

(a)

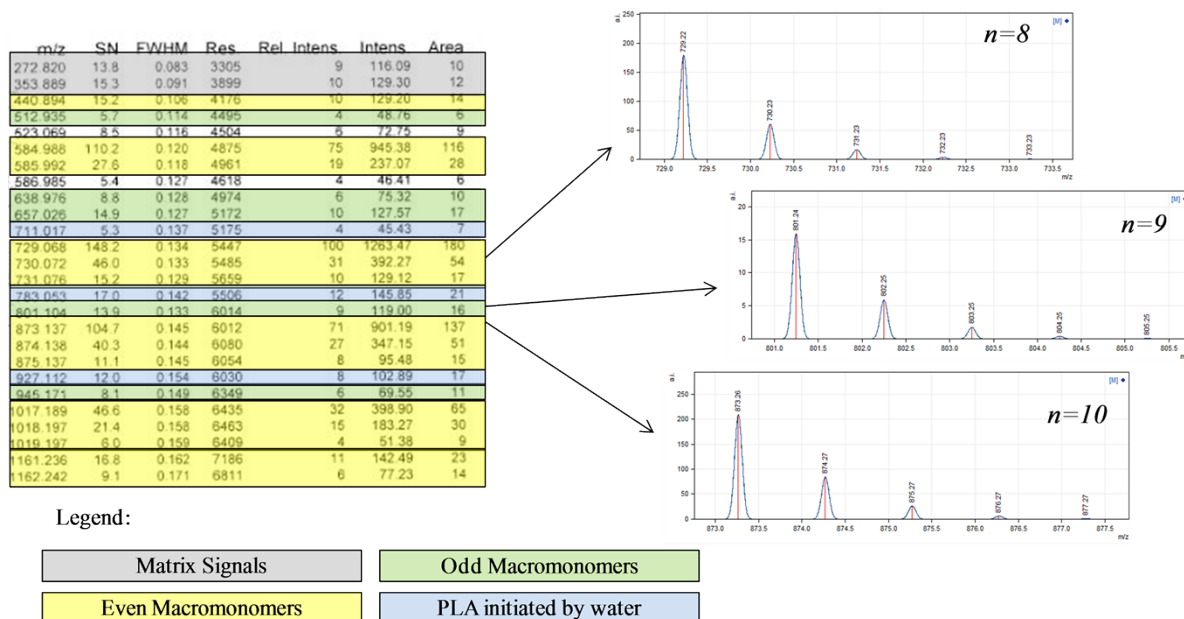

(b)

**Figure S4.** Mass list of MALDI-TOF for: (a) HEMA-LA<sub>8</sub> macromonomer produced at 130°C, 6h (**Figure 5a**), (b) HEMA-LA<sub>8</sub> macromonomer produced at 90°C, 72h (**Figure 5b**). Examples of isotopic distributions determined using the freeware mMass [Strohalm, M.; Kavan, D.; Novák, P.; Volný M.; Havlíček V.; *Analytical Chemistry* **2010**, 82, 4648-4651] of selected macromonomers are reported on the right side.

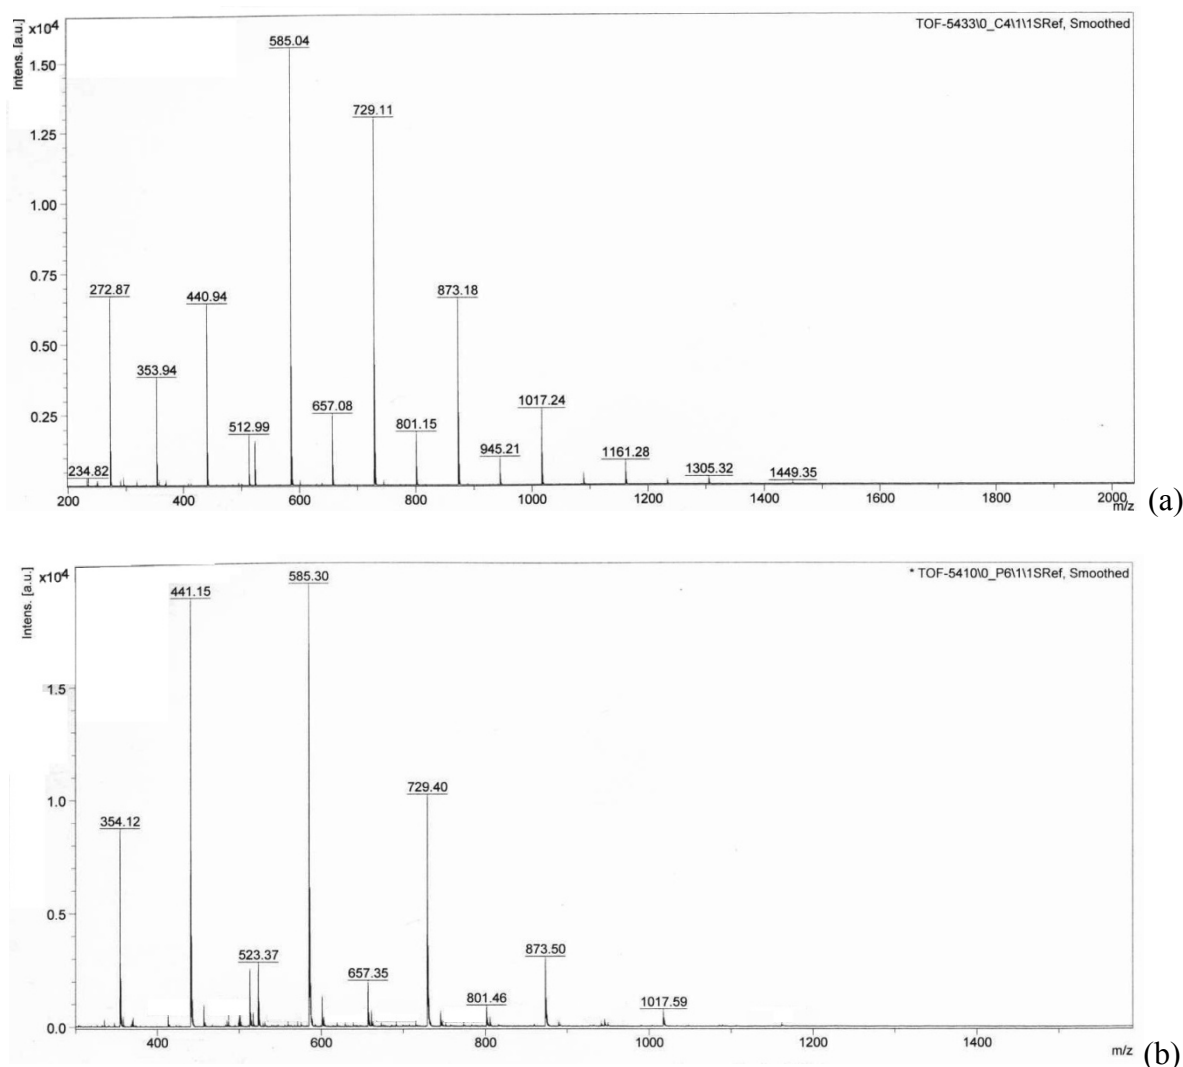

**Figure S5.** MALDI-TOF of HEMA-LA<sub>6</sub> macromonomer produced in scCO<sub>2</sub> at (a) 130 °C, 6h and (b) 90°C, 72h.



# ESI analyses

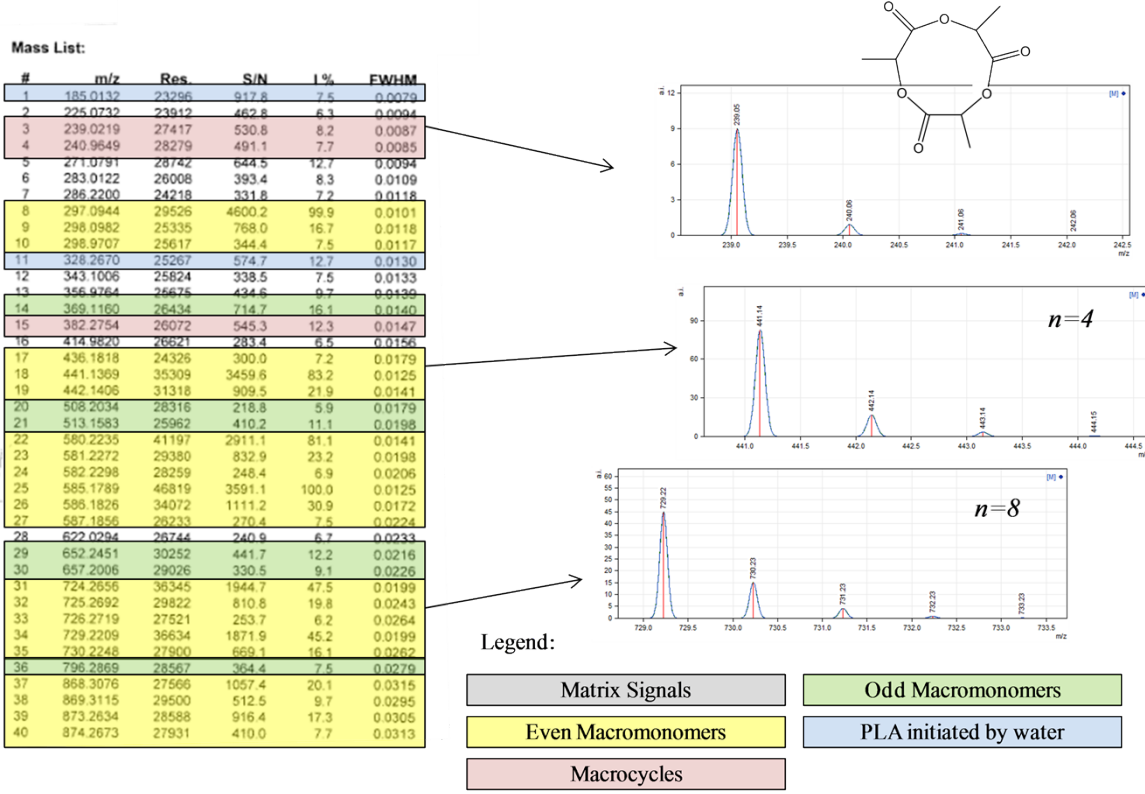

(a)

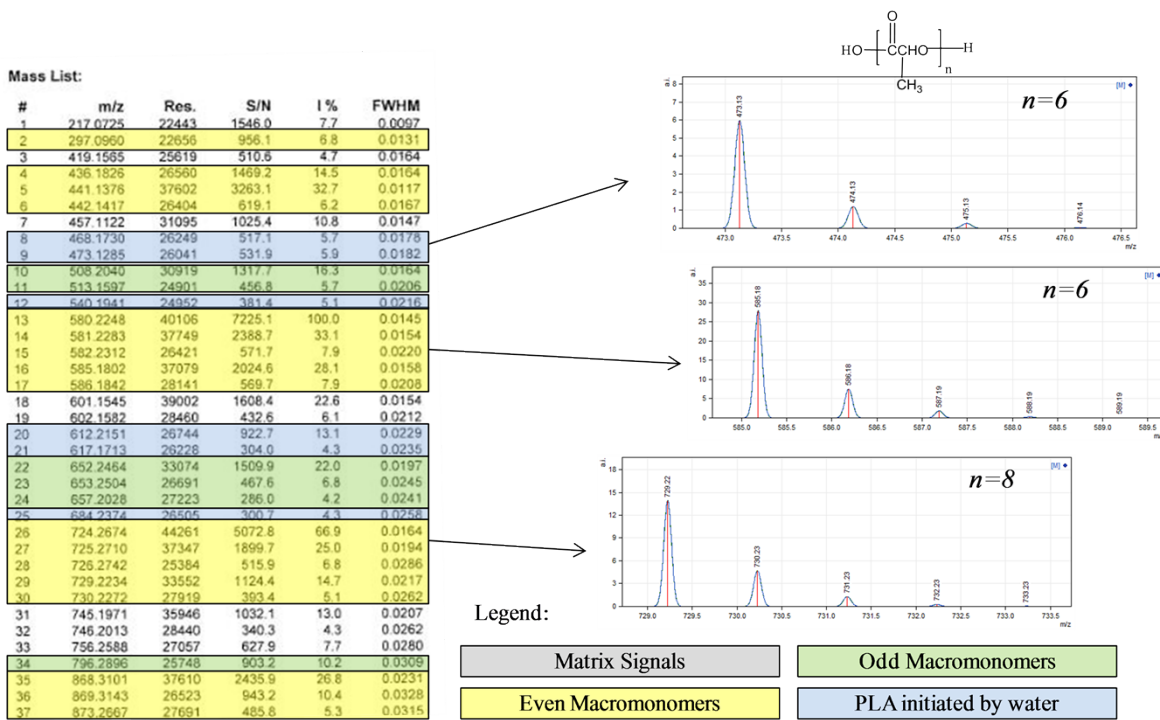

(b)

**Figure S6.** Mass list of HEMA-LA<sub>8</sub> ESI for: (a) macromonomer produced at 130°C, 6h (**Figure 6a**), (b) macromonomer produced at 90°C, 72h (**Figure 6b**). Examples of isotopic distribution determined using the freeware mMass [Strohalm, M.; Kavan, D.; Novák, P.; Volný M.; Havlíček V.; *Analytical Chemistry* **2010**, *82*, 4648-4651] of selected macromonomers are reported on the right side; sodiated distribution are reported although species ionized with [NH<sub>4</sub>]<sup>+</sup> cation are also present.

**Table S1.** MALDI-TOF characterization of the macromonomers produced at the optimum reaction time.

| macromonomer         | Temp.<br>[°C] | Time<br>[h] | MALDI-TOF     |               |           |
|----------------------|---------------|-------------|---------------|---------------|-----------|
|                      |               |             | $M_n$<br>[Da] | $M_w$<br>[Da] | $M_w/M_n$ |
| HEMA-LA <sub>8</sub> | 130           | 6           | 845           | 886           | 1.06      |
| HEMA-LA <sub>8</sub> | 110           | 18          | 844           | 903           | 1.07      |
| HEMA-LA <sub>8</sub> | 90            | 72          | 725           | 775           | 1.06      |
| HEMA-LA <sub>6</sub> | 130           | 6           | 697           | 728           | 1.05      |
| HEMA-LA <sub>6</sub> | 110           | 18          | 590           | 627           | 1.07      |
| HEMA-LA <sub>6</sub> | 90            | 72          | 581           | 614           | 1.05      |
